# Supplementary material for: Leaky Gut Driven by Dysbiosis Augments Activation and Accumulation of Liver Macrophages via RIP3 Signaling Pathway in Autoimmune Hepatitis
Source: PubMed Central journal article supplement (PMC8027109; doi:10.3389/fimmu.2021.624360), 2021-03-25
Supplement: Image_1.pdf [file Image_1.pdf]

## Supplementary Material

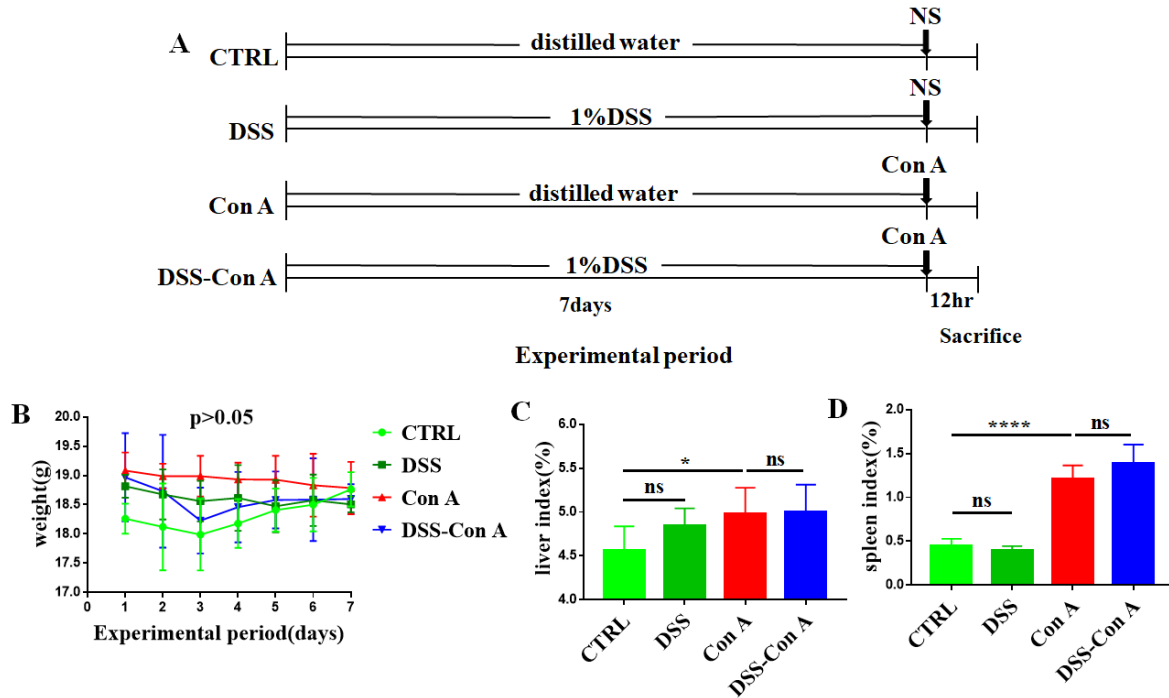

**Supplementary Figure 1.** The experimental process of DSS-Con A model and general state of mice. (A) The modeling process of DSS-Con A. (B) Body weight of each group was recorded daily. (C,D) Comparison of liver index(C) and spleen index(D) between groups. (n=6). The data were presented as means  $\pm$  SD (Student's t-test, \*  $p < 0.05$ , \*\*\*\*  $p < 0.0001$ ).

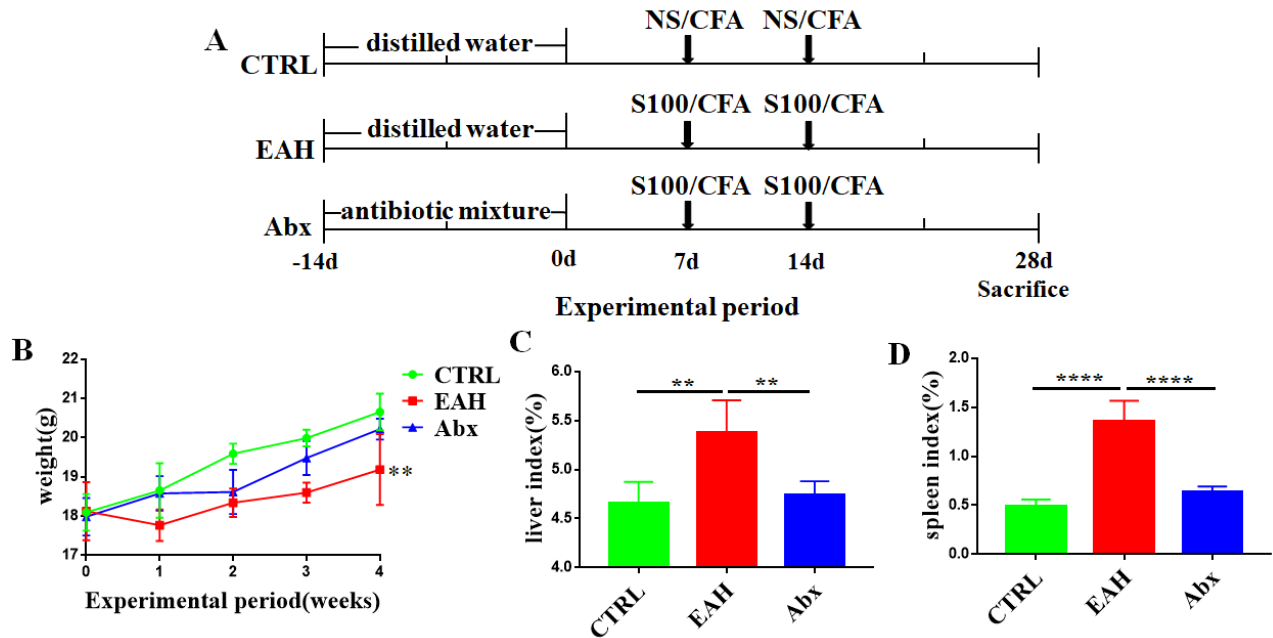

**Supplementary Figure 2.** The experimental process of EAH model and general state of mice. (A) Pre-administration of antibiotics mixture for two weeks and modeling process of EAH during 4 weeks. (B) Body weight of each group was recorded weekly. (C,D) Comparison of liver index(C) and spleen index(D) between groups. (n=6). The data were presented as means  $\pm$  SD (Student's t-test, \*\*  $p < 0.01$ , \*\*\*\*  $p < 0.0001$ ).

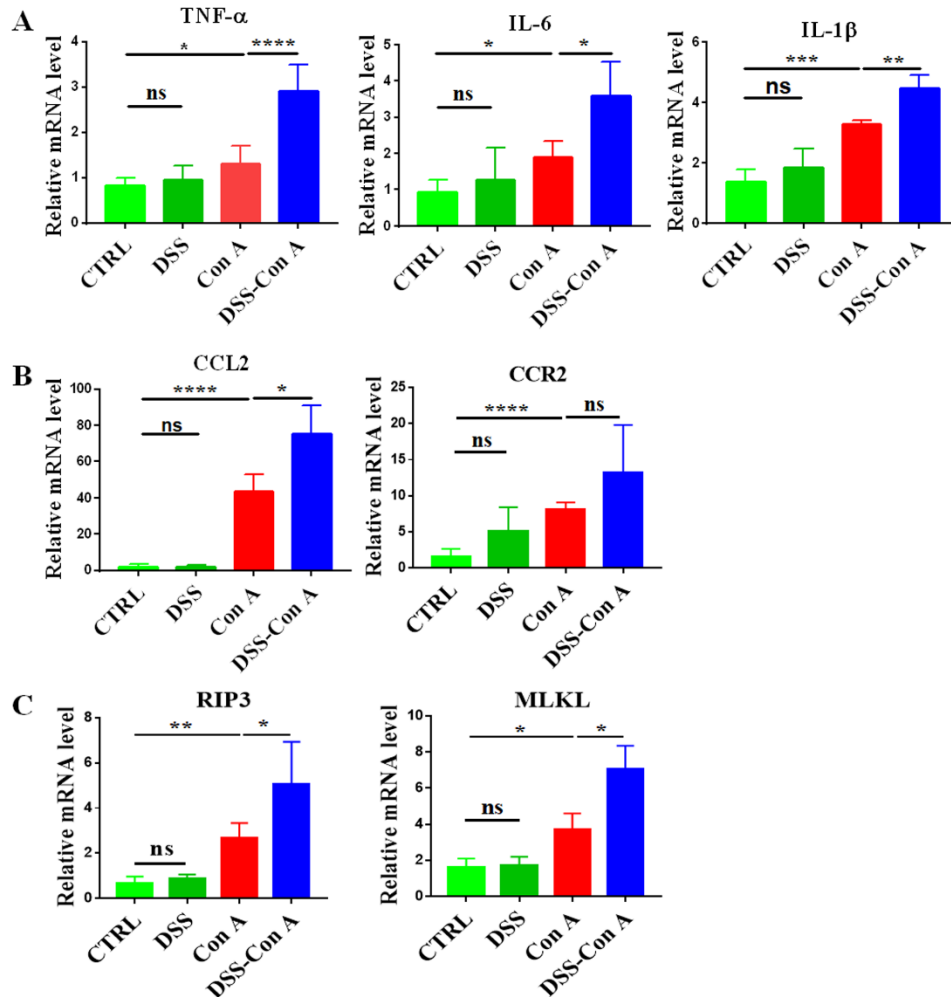

**Supplementary Figure 3.** (A-C) RT-qPCR analysis of TNF- $\alpha$ , IL-6, and IL-1 $\beta$ (A), CCL2 and CCR2(B), RIP3 and MLKL(C) on tissue homogenates from the liver of the four groups. (n=6). The data were presented as means  $\pm$  SD (Student's t-test, \* p<0.05, \*\* p<0.01, \*\*\* p<0.001, \*\*\*\* p<0.0001).

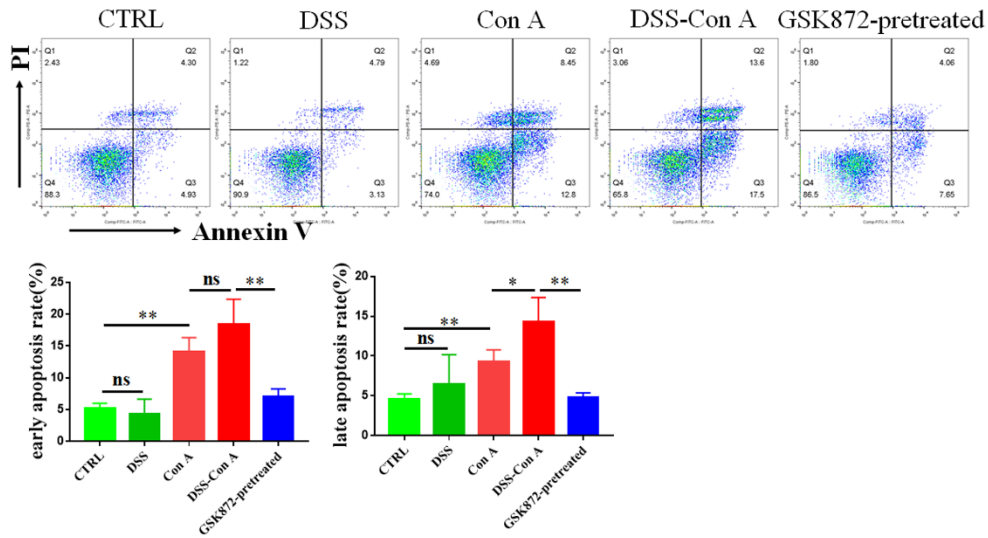

**Supplementary Figure 4.** Apoptosis of liver macrophages in the five groups was detected with Annexin V/PI and FACS. Breakage of the intestinal barrier significantly induced the late apoptosis of liver macrophages and GSK872 markedly decreased the early and late apoptosis rate. (n=6). The data were presented as means  $\pm$  SD (Student's t-test, \* p<0.05, \*\*p<0.01).

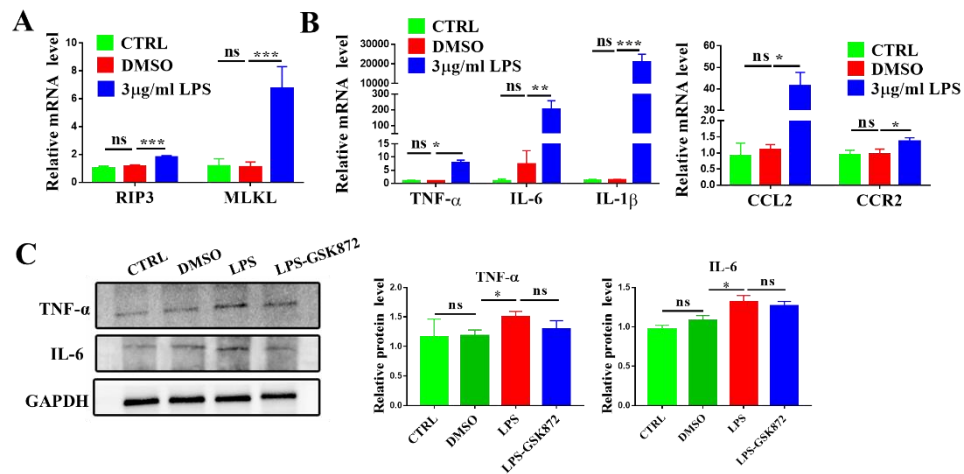

**Supplementary Figure 5.** RIP3 signaling pathway regulates the expression of macrophage-related cytokines and chemokines in RAW264.7 cell lines. (A, B) RT-qPCR analysis of RIP3 and MLKL(A), TNF- $\alpha$ , IL-6, IL-1 $\beta$ , CCL2 and CCR2(B) in RAW264.7 cells of CTRL group, DMSO group and LPS group. (C) The protein level of RIP3, MLKL and key cytokines such as TNF- $\alpha$  and IL-6 were detected and the relative intensity was quantified. The data were presented as means  $\pm$  SD of three independent experiments (Student's t-test, \*  $p < 0.05$ , \*\*  $p < 0.01$ , \*\*\*  $p < 0.001$ ).

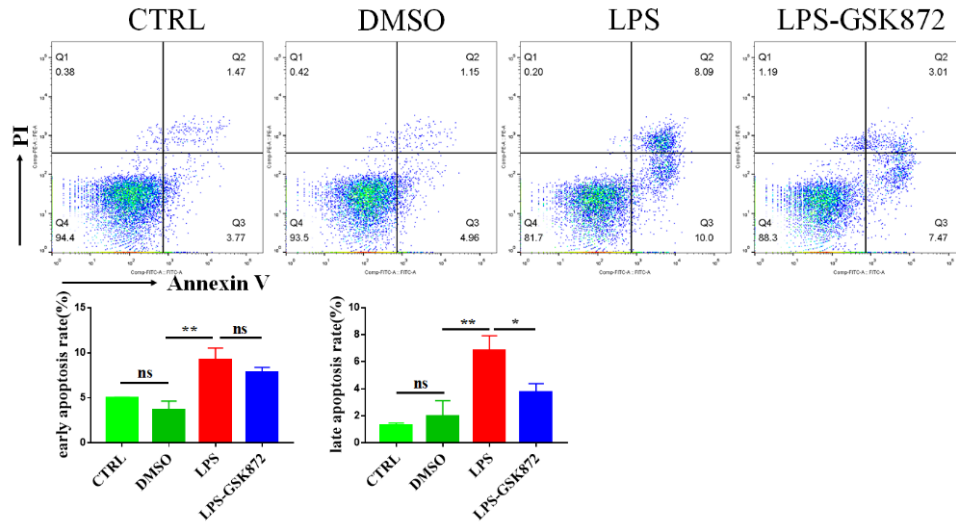

**Supplementary Figure 6.** Apoptosis of RAW264.7 cells was detected with Annexin V/PI and FACS. LPS significantly induced the early and late apoptosis of RAW264.7 cells and GSK872 markedly decreased the late apoptosis rate. The data were presented as means  $\pm$  SD of three independent experiments (Student's t-test, \*  $p < 0.05$ , \*\* $p < 0.01$ ).

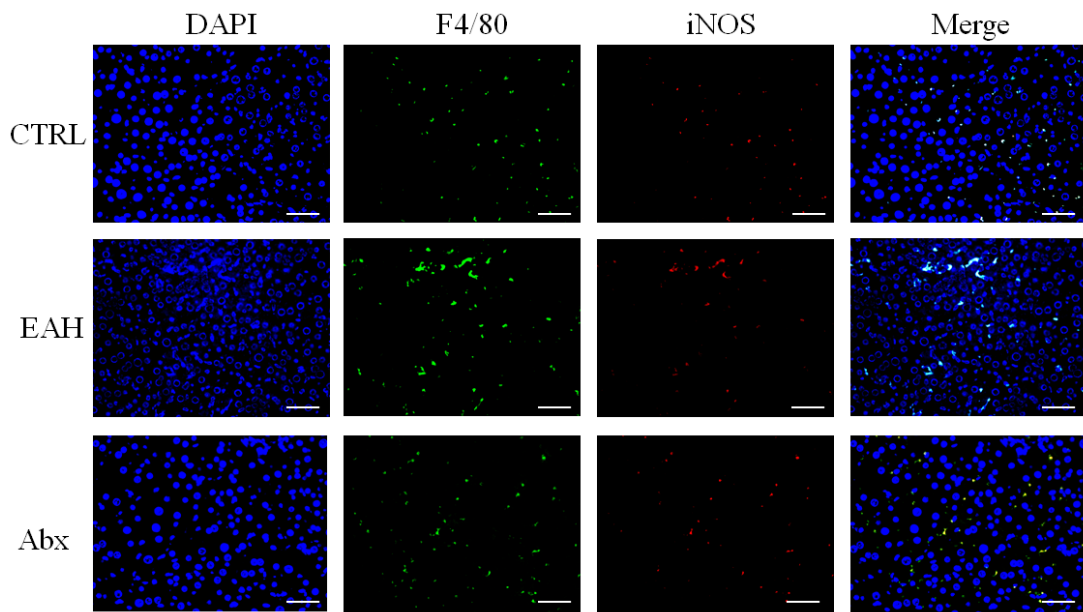

**Supplementary Figure 7.** Activation and accumulation of macrophages in the liver tissue of mice among the three groups via double-immunofluorescence staining for F4/80 and iNOS. (n=6). Scale bars: 100 $\mu$ m.

**Supplementary Table 1**

Characteristics of the participants enrolled

|                           | CTRL (n=15)     | AIH-n (n=39)     | AIH-c (n=29)  | <i>P</i> value |
|---------------------------|-----------------|------------------|---------------|----------------|
| Age (year)                | 60.3±8.1        | 58.9±8.4         | 62.4±7.1      | 0.194          |
| Sex(male/female)          | 0/15            | 2/37             | 4/25          | 0.193          |
| WBC(×10 <sup>9</sup> /L)  | 5.0±0.3         | 5.3±1.1          | 4.1±1.5       | 0.001          |
| Hgb (g/L)                 | 128.4±8.0       | 130.1±15.5       | 111.6±24.5    | 0.000          |
| PLT (×10 <sup>9</sup> /L) | 220.1±45.6      | 210.6±72.4       | 110.1±55.9    | 0.000          |
| ALB(U/L)                  | 40.3±3.0        | 40.3±5.1         | 33.5±9.1      | 0.000          |
| GLO (U/L)                 | 35.8±5.1        | 34.4±7.5         | 36.7±5.8      | 0.378          |
| ALT (U/L)                 | 14(8~16)        | 32.5(20.8~103.2) | 23(18~38)     | 0.000          |
| AST (U/L)                 | 17(15~20)       | 35(24~69.8)      | 34(26~68)     | 0.000          |
| ALP (U/L)                 | 71.8±17.4       | 83.4±24.8        | 77.9±28.7     | 0.297          |
| GGT (U/L)                 | 31.3±14.2       | 35.6±20.5        | 26.0±12.9     | 0.095          |
| TBIL(mg/dl)               | 13.2(10.8~15.4) | 13.6(10.2~26)    | 16.3(12~26.2) | 0.107          |
| IgG (mg/dl)               | NA              | 1785.7±683.0     | 2041.3±635.1  | 0.148          |
| anti-ANA (%)              | NA              | 90(35/39)        | 100(29)       | 0.130          |
| anti-SMA (%)              | NA              | 15(5/33)         | 8.7(2/23)     | 0.688          |

WBC: White blood cells; Hgb: Hemoglobin; PLT: Platelets; ALB: Albumin; GLO: globulin; ALT: Alanine transaminase; AST: Aspartate aminotransferase; ALP: Alkaline phosphatase; GGT: gamma-glutamyl transpeptidase; TBIL: total bilirubin; IgG: immunoglobulin G; anti-ANA: Anti-nuclear antibodies; anti-SMA: Anti-smooth muscle antibody.
